# Supplementary material
Source: publisher figshare collection journal article supplement (https://gsapubs.figshare.com/ndownloader/files/25467767)
Supplement: Supplementary file 1 [file 25467767]

## Sheet: Sheet3
TABLE S5. Summary of geochronology data for the magmatism in the Aqishan-Yamansu belt, Eastern Tianshan.
Location	Date rocks	Dating method	Ages/Ma	Date sources
Yamansu Formation	Dacite	LA-ICP-MS zircon U–Pb	348.0 ± 1.7	Luo et al., 2012
	Dacite	LA-ICP-MS zircon U–Pb	335.9 ± 2.4	Luo et al., 2012
	Dacite	LA-ICP-MS zircon U–Pb	334 ± 2.5	Luo et al., 2012
	Rhyolite	LA-ICP-MS zircon U–Pb	341.7 ± 2.7	Su et al., 2009
	Rhyolite	LA-ICP-MS zircon U–Pb	348.8 ± 2.1	Zhao et al., 2019a
	Crystal tuff	SHRIMP zircon U–Pb	337.5 ± 2.3	Sun et al., 2020
	Rhyolite	LA-ICP-MS zircon U–Pb	343.3 ± 2.3	This study
	Rhyolitic tuff	LA-ICP-MS zircon U–Pb	333 ± 2	This study
Tugutubulak Formation	Basalt	LA-ICP-MS zircon U–Pb	320 ± 2	Luo et al., 2015
	Rhyolite	LA-ICP-MS zircon U–Pb	320± 1.2	Li et al., 2011
	Rhyolite	LA-ICP-MS zircon U–Pb	321.7 ± 1.7	Xu et al., 2014
	Felsic brecciated tuff	LA-ICP-MS zircon U–Pb	315.6 ± 2.6	Zhao et al., 2018
	Dacitic tuffaceous lava	LA-ICP-MS zircon U–Pb	324.1 ± 2.1	Zhang et al., 2016
	Andesite	LA-ICP-MS zircon U–Pb	314.7 ± 3.0	Jiang et al., 2017
	Andesitic tuff	LA-ICP-MS zircon U–Pb	305.3 ± 3.5	Jiang et al., 2017
	Andesitic tuff	LA-ICP-MS zircon U–Pb	318.0 ± 2.0	Zhao et al., 2019b
	Dacite	SHRIMP zircon U–Pb	313.0 ± 3.3	Sun et al., 2020
	Andesitic tuff	LA-ICP-MS zircon U–Pb	319.1 ± 1.9	This study
	Andesitic tuff	LA-ICP-MS zircon U–Pb	312.0 ± 2.5	This study
	Rhyolitic ignimbrite	LA-ICP-MS zircon U–Pb	312.0 ± 2.5	This study
	Sedementary tuff	LA-ICP-MS zircon U–Pb	305.4 ± 1.6	This study
Hongyuntan	Granodiorite	LA-ICP-MS zircon U–Pb	328.5 ± 9.3	Wu et al., 2006
	Quartz monzodiorite	LA-ICP-MS zircon U–Pb	351.5 ± 1.2	Zheng, 2015
	Biotite monzonitic granite	LA-ICP-MS zircon U–Pb	326.7 ± 0.78	Zheng, 2015
	Quartz keratophyre	LA-ICP-MS zircon U–Pb	324.1 ± 3.1	Zheng, 2015
	Moyite	LA-ICP-MS zircon U–Pb	297.3 ± 0.51	Zheng, 2015
Aqishan	Granodiorite	LA-ICP-MS zircon U–Pb	336 ± 3	Du et al., 2018
	Albitophyre	LA-ICP-MS zircon U–Pb	333 ± 3	Du et al., 2018
	Diorite encalve	LA-ICP-MS zircon U–Pb	335 ± 2	Du et al., 2018
	K-feldspar granite	LA-ICP-MS zircon U–Pb	292 ± 3	Du et al., 2018
	Monzogranite	LA-ICP-MS zircon U–Pb	281 ± 2	Du et al., 2018
	Granodiorite	LA-ICP-MS zircon U–Pb	306 ± 2.8	Dai et al., 2020
	Syenogranite	LA-ICP-MS zircon U–Pb	337.6 ± 4.5	Wang et al., 2016
	Granite	LA-ICP-MS zircon U–Pb	334.0 ± 3.7	Wang et al., 2016
Bailingshan	Granodiorite	LA-ICP-MS zircon U–Pb	317.7 ± 3.7	Zhou et al. 2010
	Granodiorite	LA-ICP-MS zircon U–Pb	317.7 ± 1.8	Zhang et al., 2016
	Monzogranite	LA-ICP-MS zircon U–Pb	313.7 ± 2.1	Zhang et al., 2016
	Granite	LA-ICP-MS zircon U–Pb	307.2 ± 2.3	Zhang et al., 2016
	Diorite prophyry	LA-ICP-MS zircon U–Pb	315 ± 2.5	Long et al., 2019
	granite	LA-ICP-MS zircon U–Pb	312 ± 3	Long et al., 2019
Duotoushan	Moyite	LA-ICP-MS zircon U–Pb	271.7 ± 5.5	Zhou et al. 2010
	Granite porphyry	LA-ICP-MS zircon U–Pb	316.3 ± 8.1	Zhang et al., 2017
	Monzonitic granite	LA-ICP-MS zircon U–Pb	318.3 ± 3	Zhang et al., 2017
	Dacite porphyry	LA-ICP-MS zircon U–Pb	197.2 ± 3.5	Zhang et al., 2017
Hongshanliang	Granite porphyry	LA-ICP-MS zircon U–Pb	343.3 ± 2.3	Zhao et al., 2019a
Weiquan	Granodiorite	SHRIMP zircon U–Pb	297 ± 3	Wang et al., 2005
Shuanglong	Granodiorite	LA-ICP-MS zircon U–Pb	307.5 ± 1.7	Zhao et al., 2019b
	Diorite	LA-ICP-MS zircon U–Pb	317.1 ± 3.3	This study
	Monzogranite	LA-ICP-MS zircon U–Pb	311 ± 1.4	This study
	Granite porphyry	LA-ICP-MS zircon U–Pb	306.9 ± 1.7	This study
	Quartz diorite	LA-ICP-MS zircon U–Pb	267.2 ± 1.3	This study
	Quartz diorite	LA-ICP-MS zircon U–Pb	275.5 ± 2.3	This study
	Diorite porphyry	LA-ICP-MS zircon U–Pb	274.9 ± 1.5	This study
	Diorite porphyry	LA-ICP-MS zircon U–Pb	275.1 ± 2.1	This study
Chilongfeng	Biotite diorite	LA-ICP-MS zircon U–Pb	316.7 ± 1.4	Zhao et al., 2018
	Granodiorite	LA-ICP-MS zircon U–Pb	305.8 ± 1.9	Zhao et al., 2018
	Syenite	LA-ICP-MS zircon U–Pb	252.5 ± 1.4	Zhao et al., 2018
Yamansubei	Moyite	LA-ICP-MS zircon U–Pb	227.9 ± 0.47	Lei et al., 2013
	Diorite	LA-ICP-MS zircon U–Pb	298.5 ± 5.1	Jiang et al., 2017
	Diorite porphyry	LA-ICP-MS zircon U–Pb	322.2 ± 1.7	Xu et al., 2014
Xifengshan	Moyite	LA-ICP-MS zircon U–Pb	349.0 ± 3.4	Zhou et al., 2010
Changtiaoshan	Quartz diorite	LA-ICP-MS zircon U–Pb	337.4 ± 2.8	Zhou et al., 2010
Baishiquan	Moyite	LA-ICP-MS zircon U–Pb	303 ± 18	Zhou et al., 2010
Longdong	Monzonitic granite	LA-ICP-MS zircon U–Pb	276.2 ± 2.5	Zhou et al., 2010
	Quartz diorite	Single grain zircon (dilution method)	261	Li et al., 2002
